# Supplementary material
Source: Springer Nature journal article supplement (https://www.springermedizin.de/resource/supplementary/12906_2012_1205_MOESM5_ESM.pdf/9520126)
Supplement: MOESM5 [file 9520126]

Table 5 The kinds of Kampo medicines which physicians selected for the prescription

| Kampo Medicine   | All (n=200) |      | Palliative Care Teams(n=149) |      | PCU(n=46) |      | p-value | Specialists(n=75) |      | non-specialists(n=125) |      | p-value |
|------------------|-------------|------|------------------------------|------|-----------|------|---------|-------------------|------|------------------------|------|---------|
|                  | frequency   | %    | frequency                    | %    | frequency | %    |         | frequency         | %    | frequency              | %    |         |
| Daikenchuto      | 140         | 70.0 | 109                          | 73.2 | 29        | 63.0 | 0.124   | 55                | 73.3 | 85                     | 68.0 | 0.524   |
| Goshajinkigan    | 100         | 50.0 | 89                           | 59.7 | 11        | 23.9 | 0.000   | 35                | 46.7 | 65                     | 52.0 | 0.559   |
| Rikkunshito      | 97          | 48.5 | 82                           | 55.0 | 15        | 32.6 | 0.001   | 41                | 54.7 | 56                     | 44.8 | 0.191   |
| Shakuyakukanzoto | 96          | 48.0 | 76                           | 51.0 | 20        | 43.5 | 0.069   | 42                | 56.0 | 54                     | 43.2 | 0.108   |
| Hochuekkito      | 90          | 45.0 | 76                           | 51.0 | 13        | 28.3 | 0.011   | 35                | 46.7 | 55                     | 44.0 | 0.770   |
| Juzentaihoto     | 84          | 42.0 | 73                           | 49.0 | 11        | 23.9 | 0.001   | 32                | 42.7 | 52                     | 41.6 | 1.000   |
| Yokukansan       | 61          | 30.5 | 45                           | 30.2 | 16        | 34.8 | 0.253   | 25                | 33.3 | 36                     | 28.8 | 0.528   |
| Hangeshashinto   | 54          | 27.0 | 51                           | 34.2 | 3         | 6.5  | 0.000   | 20                | 26.7 | 34                     | 27.2 | 1.000   |
| others           | 24          | 12.0 | 20                           | 13.4 | 4         | 8.7  | 0.457   | 8                 | 10.7 | 16                     | 12.8 | 0.823   |

\*Multiple answers allowed
